# Supplementary material for: Evaluation of a Sustained-Release Prednisolone Acetate Biodegradable Subconjunctival Implant in a Non-Human Primate Model
Source: PubMed Central journal article supplement — Transl Vis Sci Technol. 2017 Oct 5;6(5):9. doi: 10.1167/tvst.6.5.9 (PMC5629924; doi:10.1167/tvst.6.5.9), 2017-10-05
Supplement: tvst-06-05-06_s01.pdf [file tvst-06-05-06_s01.pdf]

Supplementary Table 1. Haematology analysis

|                                    | Blank 8mm microrods | Blank 16mm microrods | Prednisolone Acetate 8mm microrods | Prednisolone Acetate 16mm microrods | P values* |
|------------------------------------|---------------------|----------------------|------------------------------------|-------------------------------------|-----------|
| <b>Before implantation</b>         |                     |                      |                                    |                                     |           |
| <b>RBC</b>                         | 5.26 ±0.53          | 5.44 ±0.37           | 5.62 ±0.56                         | 5.2 ±0.50                           | 0.54      |
| <b>HGB</b>                         | 12.37 ±0.72         | 13.27 ±1.06          | 12.7 ±0.87                         | 12.37 ±0.95                         | 0.86      |
| <b>HCT</b>                         | 39.97 ±3.46         | 41.93 ±1.61          | 42.97 ±3.04                        | 40.7 ±3.92                          | 0.82      |
| <b>MCV</b>                         | 76.17 ±4.51         | 80.9 ±2.04           | 76.3 ±1.99                         | 78.3 ±3.18                          | 0.63      |
| <b>MCH</b>                         | 23.53 ±1.63         | 24.43 ±0.47          | 22.63 ±0.93                        | 23.8 ±0.66                          | 0.73      |
| <b>MCHC</b>                        | 30.93 ±0.70         | 30.2 ±1.11           | 29.53 ±0.91                        | 30.43 ±0.72                         | 0.82      |
| <b>PLT</b>                         | 387.67 ±8.96        | 390.33 ±26.50        | 441 ±151.09                        | 389.33 ±96.50                       | 0.49      |
| <b>WBC</b>                         | 9.67 ±2.74          | 12.64 ±4.20          | 9.96 ±4.31                         | 36.41 ±46.55                        | 0.37      |
| <b>Reticulocyte count</b>          | 77.5 ±12.04         | 77.27 ±17.71         | 91.33 ±9.09                        | 89.53 ±45.52                        | 0.64      |
| <b>Reticulocyte %</b>              | 1.5 ±0.20           | 1.47 ±0.38           | 1.67 ±0.31                         | 1.67 ±0.74                          | 0.75      |
| <b>Neutrophil count</b>            | 5.37 ±1.74          | 7.32 ±3.12           | 5.45 ±2.67                         | 5.49 ±0.77                          | 0.71      |
| <b>Neutrophil %</b>                | 55.1 ±3.20          | 57.13 ±7.05          | 53.23 ±6.00                        | 59.47 ±6.85                         | 0.80      |
| <b>Eosinophil count</b>            | 0.05 ±0.02          | 0.09 ±0.08           | 0.29 ±0.18                         | 0.07 ±0.02                          | 0.66      |
| <b>Eosinophil %</b>                | 0.53 ±0.06          | 0.93 ±1.10           | 3.27 ±1.92                         | 0.8 ±0.10                           | 0.45      |
| <b>Basophil count</b>              | 0.013 ±0.01         | 0.02 ±0.00           | 0.017 ±0.01                        | 0.017 ±0.01                         | 0.69      |
| <b>Basophil %</b>                  | 0.17 ±0.12          | 0.17 ±0.06           | 0.13 ±0.06                         | 0.2 ±0.00                           | 0.58      |
| <b>Lymphocyte count</b>            | 3.83 ±0.95          | 4.83 ±1.53           | 3.74 ±1.49                         | 3.54 ±1.58                          | 0.66      |
| <b>Lymphocyte %</b>                | 39.9 ±1.76          | 38.7 ±8.07           | 38.03 ±1.89                        | 36.53 ±7.22                         | 0.56      |
| <b>Monocyte count</b>              | 0.35 ±0.10          | 0.32 ±0.17           | 0.42 ±0.10                         | 0.24 ±0.02                          | 0.40      |
| <b>Monocyte %</b>                  | 3.8 ±1.51           | 2.63 ±1.10           | 4.83 ±2.44                         | 2.67 ±0.57                          | 0.37      |
| <b>LUC count</b>                   | 0.05 ±0.01          | 0.057 ±0.02          | 0.047 ±0.02                        | 0.04 ±0.02                          | 0.82      |
| <b>LUC%</b>                        | 0.5 ±0.10           | 0.433 ±0.12          | 0.5 ±0.00                          | 0.4 ±0.10                           | 0.80      |
| <b>12 weeks after implantation</b> |                     |                      |                                    |                                     |           |
| <b>RBC</b>                         | 5.57 ±0.73          | 5.54 ±0.36           | 6.04 ±0.56                         | 5.37 ±0.34                          | 0.72      |
| <b>HGB</b>                         | 13 ±0.89            | 13.4 ±0.79           | 13.47 ±0.92                        | 12.67 ±0.60                         | 0.80      |
| <b>HCT</b>                         | 42.9 ±3.32          | 44.3 ±2.38           | 46.23 ±4.10                        | 41.4 ±1.35                          | 0.63      |

|                           |               |               |                |               |      |
|---------------------------|---------------|---------------|----------------|---------------|------|
| <b>MCV</b>                | 77.5 ±5.13    | 80.07 ±1.03   | 76.57 ±1.07    | 77.2 ±2.52    | 0.61 |
| <b>MCH</b>                | 23.53 ±1.72   | 24.17 ±0.21   | 22.40 ±0.60    | 23.6 ±0.53    | 0.70 |
| <b>MCHC</b>               | 30.37 ±0.31   | 30.2 ±0.17    | 29.23 ±0.67    | 30.6 ±0.95    | 0.79 |
| <b>PLT</b>                | 444.67 ±98.56 | 451.33 ±49.44 | 448.67 ±135.08 | 429.67 ±12.32 | 0.54 |
| <b>WBC</b>                | 10.86±0.64    | 11.96 ±2.55   | 9.76 ±1.38     | 13.21 ±3.61   | 0.60 |
| <b>Reticulocyte count</b> | 138.67 ±81.96 | 71.57 ±9.88   | 88.43 ±41.12   | 85.6 ±55.97   | 0.31 |
| <b>Reticulocyte %</b>     | 2.63 ±1.96    | 1.33 ±0.25    | 1.43 ±0.60     | 1.63 ±1.10    | 0.68 |
| <b>Neutrophil count</b>   | 3.6 ±0.75     | 6.29 ±2.60    | 3.45± 0.58     | 5.87 ±2.90    | 0.45 |
| <b>Neutrophil %</b>       | 32.93 ±5.27   | 51.53 ±11.61  | 35.97 ± 9.03   | 42.17 ±12.44  | 0.29 |
| <b>Eosinophil count</b>   | 0.21 ±0.17    | 0.10 ±0.03    | 0.28 ± 0.20    | 0.30 ±0.22    | 0.79 |
| <b>Eosinophil %</b>       | 1.87 ±1.44    | 0.93 ±0.40    | 2.87 ± 2.16    | 2.2 ±1.18     | 0.48 |
| <b>Basophil count</b>     | 0.023 ±0.01   | 0.017 ±0.01   | 0.02 ± 0.01    | 0.03 ±0.01    | 0.74 |
| <b>Basophil %</b>         | 0.23 ±0.06    | 0.13 ±0.06    | 0.17 ± 0.06    | 0.2 ±0.00     | 0.77 |
| <b>Lymphocyte count</b>   | 6.57 ±0.19    | 5.14 ±1.26    | 5.42 ±1.59     | 6.41 ±0.1     | 0.50 |
| <b>Lymphocyte %</b>       | 60.73 ±5.34   | 43.9 ±12.46   | 54.8 ± 7.91    | 50.63 ±11.79  | 0.58 |
| <b>Monocyte count</b>     | 0.40 ±0.07    | 0.37 ±0.15    | 0.55 ± 0.23    | 0.53 ±0.08    | 0.46 |
| <b>Monocyte %</b>         | 3.73 ±0.81    | 3.03 ±1.00    | 5.77 ± 2.76    | 4.20 ±1.01    | 0.69 |
| <b>LUC count</b>          | 0.05 ±0.01    | 0.05 ±0.01    | 0.04 ± 0.01    | 0.07 ±0.03    | 0.77 |
| <b>LUC%</b>               | 0.5 ±0.00     | 0.43 ±0.15    | 0.43 ± 0.06    | 0.53 ±0.21    | 0.73 |

\* Comparisons across 4 groups

RBC: Red blood cell count, HGB: hemoglobin, HCT: hematocrit, MCV: mean corpuscular volume, MCH: mean corpuscular hemoglobin, MCHC: mean corpuscular hemoglobin concentration, PLT: platelet, WBC, white blood cell count, LUC: large unstained cell
