# Supplementary material for: Evaluation of a Sustained-Release Prednisolone Acetate Biodegradable Subconjunctival Implant in a Non-Human Primate Model
Source: PubMed Central journal article supplement — Transl Vis Sci Technol. 2017 Oct 5;6(5):9. doi: 10.1167/tvst.6.5.9 (PMC5629924; doi:10.1167/tvst.6.5.9), 2017-10-05
Supplement: tvst-06-05-06_s02.pdf [file tvst-06-05-06_s02.pdf]

**Supplementary Table 2. Coagulation factors analysis**

|                                            | Before implantation |                     | 12 weeks after implantation |                     |
|--------------------------------------------|---------------------|---------------------|-----------------------------|---------------------|
|                                            | Prothrombin Time    | Thromboplastin Time | Prothrombin Time            | Thromboplastin Time |
| <b>Blank 8mm microrods</b>                 | 10.93 ±1.37         | 22.97 ±4.65         | 10.4 ±1.05                  | 24.2 ±9.81          |
| <b>Blank 16mm microrods</b>                | 8.36 ±0.7           | 24.19 ±11.41        | 8.23 ±0.31                  | 22.62 ±6.74         |
| <b>Prednisolone Acetate 8mm microrods</b>  | 8.88 ±0.9           | 21.43 ±7.45         | 8.43 ±0.55                  | 17.43 ±2.57         |
| <b>Prednisolone Acetate 16mm microrods</b> | 8.43 ±0.61          | 20.00 ±5.00         | 7.96 ±0.95                  | 21.39 ±9.28         |
| <b>P value across 4 groups</b>             | 0.33                | 0.45                | 0.41                        | 0.30                |
