# Supplementary material for: Evaluation of a Sustained-Release Prednisolone Acetate Biodegradable Subconjunctival Implant in a Non-Human Primate Model
Source: PubMed Central journal article supplement — Transl Vis Sci Technol. 2017 Oct 5;6(5):9. doi: 10.1167/tvst.6.5.9 (PMC5629924; doi:10.1167/tvst.6.5.9), 2017-10-05
Supplement: tvst-06-05-06_s03.pdf [file tvst-06-05-06_s03.pdf]

**Supplementary Table 3. Blood biochemical parameters**

|                                    | <b>Blank 8mm microrods</b> | <b>Blank 16mm microrods</b> | <b>40% Prednisolone Acetate 8mm microrods</b> | <b>40% Prednisolone Acetate 16mm microrods</b> | <b>P values*</b> |
|------------------------------------|----------------------------|-----------------------------|-----------------------------------------------|------------------------------------------------|------------------|
| <b>Before implantation</b>         |                            |                             |                                               |                                                |                  |
| <b>Na</b>                          | 142.1 ±1.57                | 144.3 ±2.93                 | 146.20 ±0.85                                  | 142.77 ±1.75                                   | 0.43             |
| <b>K</b>                           | 4.73 ±0.56                 | 5.35 ±0.16                  | 5.31 ±0.23                                    | 4.69 ±0.23                                     | 0.26             |
| <b>Cl</b>                          | 109 ±3.61                  | 108.33 ±1.53                | 109.67 ±2.08                                  | 106.33 ±2.08                                   | 0.58             |
| <b>Ca</b>                          | 10.0 ±0.4                  | 10.19 ±0.25                 | 10.06 ±0.68                                   | 9.75 ±0.13                                     | 0.53             |
| <b>P</b>                           | 4.89 ±0.8                  | 5.14 ±0.53                  | 4.64 ±1.14                                    | 5.01 ±0.99                                     | 0.47             |
| <b>ALP</b>                         | 320.67 ±72.00              | 313 ±47.70                  | 309.00 ±83.11                                 | 236.33 ±75.66                                  | 0.26             |
| <b>ALT</b>                         | 44.33 ±15.57               | 48.33 ±12.10                | 50.00 ±7.00                                   | 33.67 ±5.13                                    | 0.37             |
| <b>AST</b>                         | 82 ±15.39                  | 80.33 ±39.25                | 61.00 ±7.55                                   | 55.00 ±6.00                                    | 0.21             |
| <b>LDH</b>                         | 972.67 ±428.09             | 839.33 ±336.26              | 626.67 ±122.01                                | 718.67 ±190.96                                 | 0.18             |
| <b>CK</b>                          | 1160.00 ±517.92            | 2131.67 ±1621.09            | 1167.00 ±421.38                               | 1266.67 ±337.65                                | 0.15             |
| <b>BUN</b>                         | 19.33 ±1.15                | 18.67 ±1.53                 | 17.33 ±3.21                                   | 21.00 ±3.61                                    | 0.40             |
| <b>Glucose</b>                     | 51.00 ±9.64                | 66.33 ±12.10                | 72.67 ±7.09                                   | 58.33 ±5.86                                    | 0.18             |
| <b>Cholesterol</b>                 | 115.33 ±32.75              | 125.33 ±25.50               | 116.33 ±13.58                                 | 129.00 ±31.05                                  | 0.21             |
| <b>Triglycerol</b>                 | 37.67 ±10.60               | 34.67 ±5.51                 | 47 ±17.09                                     | 43.00 ±13.53                                   | 0.28             |
| <b>Creatinine</b>                  | 0.5 ±0.14                  | 0.06 ±0.09                  | 0.66 ±0.13                                    | 0.61 ±0.11                                     | 0.36             |
| <b>Total protein</b>               | 6.85 ±0.50                 | 6.96 ±0.02                  | 6.58 ±0.21                                    | 7.07 ±0.14                                     | 0.59             |
| <b>Albumin (Alb)</b>               | 3.87 ±0.13                 | 4.01 ±0.14                  | 3.81 ±0.28                                    | 4.16 ±0.18                                     | 0.55             |
| <b>Globulin (G)</b>                | 2.98 ±0.42                 | 2.95 ±0.13                  | 2.78 ±0.10                                    | 2.91 ±0.19                                     | 0.66             |
| <b>Alb:G</b>                       | 1.31 ±0.17                 | 1.37 ±0.11                  | 1.38 ±0.14                                    | 1.43 ±0.15                                     | 0.79             |
| <b>Total bilirubin</b>             | 0.33 ±0.13                 | 0.16 ±0.09                  | 0.14 ±0.04                                    | 0.14 ±0.02                                     | 0.59             |
| <b>12 weeks after implantation</b> |                            |                             |                                               |                                                |                  |
| <b>Na</b>                          | 142.93 ±1.50               | 145.03 ±2.05                | 153.23 ±1.23                                  | 143.57 ±0.87                                   | 0.33             |
| <b>K</b>                           | 5.06 ±0.24                 | 5.29 ±0.21                  | 5.77 ±0.33                                    | 5.19 ±0.24                                     | 0.42             |
| <b>Cl</b>                          | 104.67 ±4.51               | 105.33 ±3.21                | 109.33 ±1.15                                  | 107.67 ±2.52                                   | 0.49             |
| <b>Ca</b>                          | 10.20 ±0.13                | 10.23 ±0.38                 | 10.47 ±0.45                                   | 10.07 ±0.09                                    | 0.75             |
| <b>P</b>                           | 5.94 ±0.86                 | 5.37 ±0.33                  | 6.72 ±0.85                                    | 4.64 ±1.50                                     | 0.51             |
| <b>ALP</b>                         | 310.33 ±109.46             | 286.67 ±27.15               | 341.33 ±119.27                                | 220.33 ±29.26                                  | 0.28             |
| <b>ALT</b>                         | 27.33 ±6.66                | 28.00 ±3.61                 | 37.67 ±4.62                                   | 24.67 ±1.53                                    | 0.27             |
| <b>AST</b>                         | 39.67 ±14.57               | 28.67 ±3.79                 | 30.33 ±6.35                                   | 32.00 ±2.65                                    | 0.19             |
| <b>LDH</b>                         | 593.67 ±286.64             | 565.33 ±132.39              | 379.67 ±11.85                                 | 534.67 ±113.61                                 | 0.14             |

|                        |               |               |               |               |      |
|------------------------|---------------|---------------|---------------|---------------|------|
| <b>CK</b>              | 166.67 ±50.93 | 115.67 ±7.64  | 29.001 ±30.00 | 119.00 ±37.64 | 0.17 |
| <b>BUN</b>             | 21 ±7.00      | 20.33 ±6.66   | 15.67 ±2.52   | 16.33 ±5.69   | 0.47 |
| <b>Glucose</b>         | 71.65±10.44   | 67.01 ±4.36   | 78.67 ±18.15  | 77.67 ±5.51   | 0.39 |
| <b>Cholesterol</b>     | 125.33 ±37.61 | 135.33 ±24.68 | 142.67 ±23.16 | 133.33 ±21.94 | 0.28 |
| <b>Triglycerol</b>     | 40.33 ±4.16   | 47.33 ±18.34  | 49.00 ±6.56   | 85.67 ±81.33  | 0.54 |
| <b>Creatinine</b>      | 0.49 ±0.05    | 0.59 ±0.10    | 0.76 ±0.06    | 0.59 ±0.05    | 0.56 |
| <b>Total protein</b>   | 6.54 ±0.18    | 6.51 ±0.23    | 6.82 ±0.38    | 6.92 ±0.43    | 0.60 |
| <b>Albumin (Alb)</b>   | 4.83 ±1.32    | 3.99 ±0.07    | 4.27 ±0.26    | 4.17 ±0.51    | 0.41 |
| <b>Globulin (G)</b>    | 2.61 ±0.27    | 2.52 ±0.20    | 2.55 ±0.16    | 2.74 ±0.22    | 0.78 |
| <b>Alb:G</b>           | 1.52 ±0.24    | 1.59 ±0.12    | 1.68 ±0.09    | 1.54 ±0.27    | 0.66 |
| <b>Total bilirubin</b> | 0.12 ±0.03    | 0.11 ±0.04    | 0.16 ±0.04    | 0.07 ±0.03    | 0.73 |

\* Comparisons across 4 groups

ALP: alkaline phosphatase, ALT: alanine aminotransferase, AST: aspartate aminotransferase, LDH: lactate dehydrogenase, CK: *creatine kinase*, BUN: *blood urea nitrogen*
